# Supplementary material
Source: PubMed Central journal article supplement (PMC5563465)
Supplement: NIHMS798675-supplement-Appendix_A.pdf [file NIHMS798675-supplement-Appendix_A.pdf]

Appendix A: Unstandardized linear regression coefficients, residual standard deviations, and 95% CIs for usual sleep duration, Add Health respondents in Waves 1-4.

---

|                                                     |                           |
|-----------------------------------------------------|---------------------------|
| Age                                                 | -0.27***<br>(-0.29,-0.25) |
| (Dummy for age > 15) * (age-15)                     | 0.03***<br>(0.03,0.04)    |
| (Dummy for age > 20) * (age-20)                     | -0.04***<br>(-0.05,-0.03) |
| (Dummy for age > 25) * (age-25)                     | 0.01<br>(-0.01,0.02)      |
| Male (=1)                                           | 0.11<br>(-0.40,0.62)      |
| Wave 1                                              | ref.                      |
| Wave 2                                              | -0.02<br>(-0.05,0.01)     |
| Wave 3                                              | 0.74***<br>(0.64,0.84)    |
| Wave 4                                              | 0.70***<br>(0.58,0.83)    |
| Male * age                                          | 0.00<br>(-0.03,0.04)      |
| Male * (Dummy for age > 15) * (age-15)              | -0.02***<br>(-0.02,-0.01) |
| Male * (Dummy for age > 20) * (age-20)              | 0.03***<br>(0.02,0.04)    |
| Male * (Dummy for age > 25) * (age-25)              | -0.02***<br>(-0.03,-0.01) |
| Constant                                            | 11.88***<br>(11.54,12.23) |
| Standard deviations of between-individual residuals |                           |
| Ages 11-14                                          | 0.60***<br>(0.54,0.66)    |
| Ages 15-18                                          | 0.80***<br>(0.77,0.83)    |
| Ages 19-22                                          | 0.91***<br>(0.88,0.96)    |
| Ages 23-26                                          | 0.84***<br>(0.79,0.88)    |
| Ages 27-30                                          | 0.56***<br>(0.51,0.61)    |
| Ages 31-34                                          | 0.50***<br>(0.42,0.59)    |
| Standard deviation of within-individual residuals   | 1.13***<br>(1.11,1.15)    |
| Observations                                        | 59,200                    |
| Number of respondents                               | 14,800                    |

---

Note: \*\*\* p<0.001, \*\* p<0.01, \* p<0.05 (2-tailed test)
